# Supplementary material
Source: HighWire-hosted journal article supplement (https://bmjopen.bmj.com/content/14/8/e087020)
Supplement: inline-supplementary-material-6 [file inline-supplementary-material-6.pdf]

Changes in condition specific outcomes over time (each line represents an individual participant)

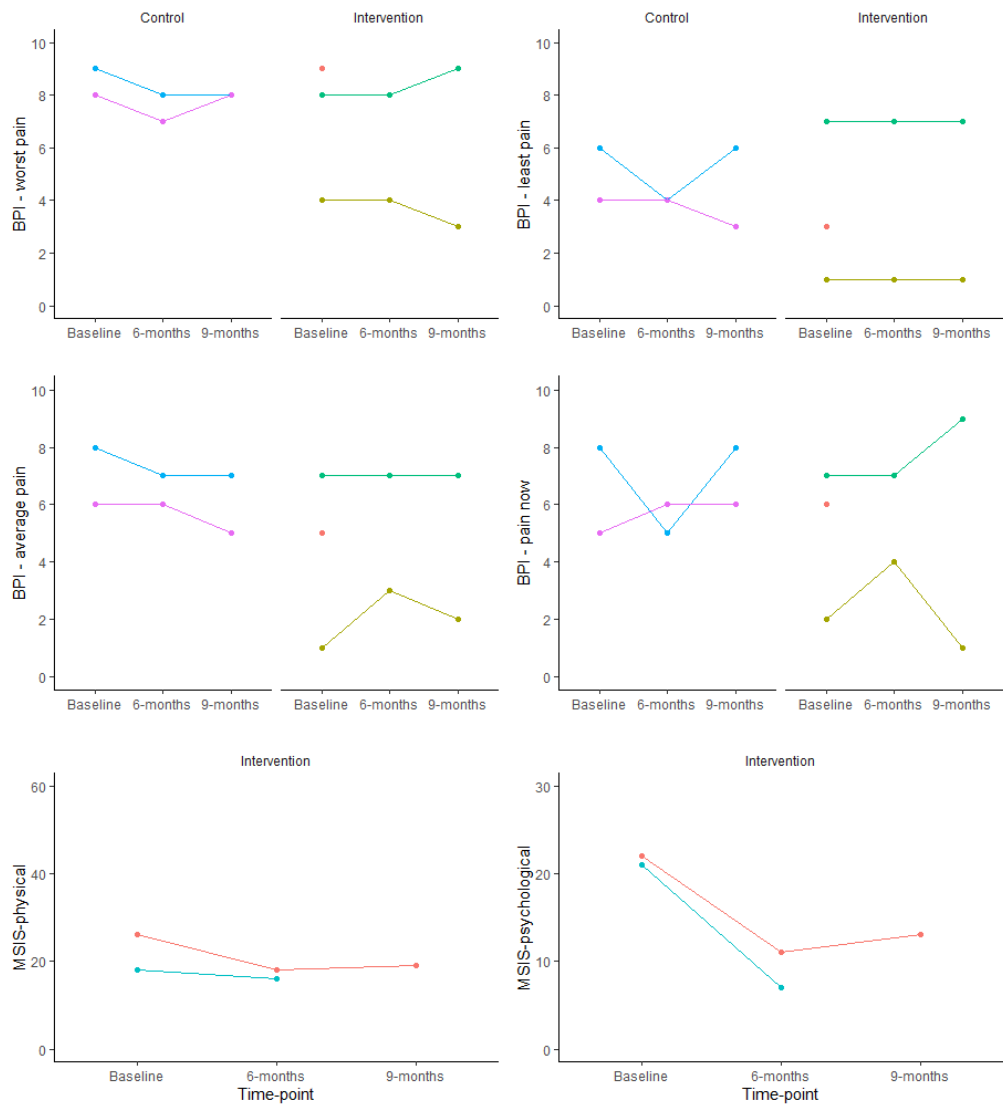

Legend: BPI, Brief Pain Inventory; MSIS, Multiple Sclerosis Impact Scale-29v2
